# Supplementary material for: Phenotypic and Genetic Variation in Morphophysiological Traits in Huanglongbing-Affected Mandarin Hybrid Populations
Source: MDPI journal article supplement (doi:10.3390/plants12010042), 2022-12-22
Supplement: s1 [file s1]

**Table S1.** Selected OJIP test parameters used in this study.

| Parameter                | Formula                                                                                                                                                           | Meaning                                                                                                             |
|--------------------------|-------------------------------------------------------------------------------------------------------------------------------------------------------------------|---------------------------------------------------------------------------------------------------------------------|
| $F_v/F_m$ or $\phi_{Po}$ | $(F_m - F_o)/F_m$                                                                                                                                                 | Maximum quantum efficiency of PSII                                                                                  |
| $\gamma_{RC}$            | $\frac{Chl_{RC}}{Chl_{Total}} = \frac{RC/J_{ABS}}{1 + RC/J_{ABS}}$ $= \frac{M_o}{V_J \cdot \phi_{Po} + M_o}$                                                      | Probability that PSII acts as a reaction center                                                                     |
| $\Psi_{ET1}$             | $\frac{J_0^{TR}}{J^{ABS}} \cdot \frac{J^{ABS}}{CS} = \frac{F_m}{F_o} \cdot F_m$                                                                                   | Efficiency of electron transfer from Q <sub>a</sub> to Q <sub>b</sub>                                               |
| $\delta_{RE1}$           | $\frac{J_o^{RE1}}{J_o^{ET2}} = \frac{1 - V_I}{1 - V_J}$                                                                                                           | Efficiency of electron transfer from Q <sub>b</sub> to PSI                                                          |
| PI <sub>abs</sub>        | $\frac{\phi_{Po}}{1 - \phi_{Po}} \cdot \frac{\Psi_{ET1}}{1 - \Psi_{ET1}} \cdot \frac{\gamma_{RC}}{1 - \gamma_{RC}}$ $\cdot \frac{\delta_{RE1}}{1 - \delta_{RE1}}$ | Performance index of energy conservation from photons absorbed by PSII antenna until the reduction of PSI acceptors |

3 **Table S2. Diagnosis of *Candidatus Liberibacter asiaticus* infection based on qPCR *Ct* value**

| HLB Diagnosis*    | HLB<br>Positive | No HLB Found | Total | Mean      | Range     |
|-------------------|-----------------|--------------|-------|-----------|-----------|
| First Diagnosis   | 325             | 113          | 438   | 33.5±0.2  | 20.1-40.0 |
| Second Diagnosis  | 208             | 236          | 444   | 36.2±4.8  | 23.4-40.0 |
| Combine Diagnosis | 362             | 108          | 444   | 33.63±0.2 | 20.1-40.0 |

4 \* Leaf sample was collected for first diagnosis on December 24, 2019, and second was on April 20, 2020. Combine diagnosis was  
5 chosen from the lowest ct value of first and second diagnosis

**Table S3. Analysis of variance for morphological and physiological traits under different HLB score**

| Variable          | Source   | DF  | Sum of Squares | Mean Square | F value | P value |
|-------------------|----------|-----|----------------|-------------|---------|---------|
| LAI               | Model    | 8   | 193.7484       | 24.2186     | 57.1411 | <.0001  |
|                   | Error    | 438 | 185.6409       | 0.4238      |         |         |
|                   | C.Total  | 446 | 379.3893       |             |         |         |
| Leaf area ()      | Model    | 8   | 12698.01       | 1587.25     | 4.5052  | <.0001  |
|                   | Error    | 439 | 154666.5       | 352.32      |         |         |
|                   | C.Total  | 447 | 167364.5       |             |         |         |
| Dry weight ()     | Model    | 8   | 1.702692       | 0.212837    | 3.451   | 0.0007  |
|                   | Error    | 422 | 26.02633       | 0.061674    |         |         |
|                   | C.Total  | 430 | 27.72902       |             |         |         |
| PI <sub>abs</sub> | Model    | 8   | 13.79524       | 1.72441     | 2.0822  | 0.0362  |
|                   | Error    | 439 | 363.5642       | 0.82816     |         |         |
|                   | C. Total | 447 | 377.3595       |             |         |         |
| Fv/Fm             | Model    | 8   | 0.008395       | 0.001049    | 1.0091  | 0.4282  |
|                   | Error    | 439 | 0.456556       | 0.00104     |         |         |
|                   | C. Total | 447 | 0.464952       |             |         |         |
| Fv/Fo             | Model    | 8   | 2.7978         | 0.349725    | 1.4535  | 0.1722  |
|                   | Error    | 439 | 105.6264       | 0.240607    |         |         |
|                   | C. Total | 447 | 108.4242       |             |         |         |
| LMA ()            | Model    | 8   | 4.3E-05        | 5.37E-06    | 1.4585  | 0.1704  |
|                   | Error    | 422 | 0.001555       | 3.68E-06    |         |         |
|                   | C. Total | 430 | 0.001598       |             |         |         |
| Ct value          | Model    | 8   | 156.2934       | 19.5367     | 0.9502  | 0.4748  |
|                   | Error    | 428 | 8799.823       | 20.5603     |         |         |
|                   | C. Total | 436 | 8956.117       |             |         |         |

**Table S4 Summary of Fit**

|                        |          |
|------------------------|----------|
| RSquare                | 0.496601 |
| RSquare Adj            | 0.49547  |
| Root Mean Square Error | 1.161089 |
| Mean of Response       | 5.872483 |
| Observations           | 447      |

**Table S5 Analysis of Variance**

| Source   | DF  | Sum of Squares | Mean Square | F Ratio            |
|----------|-----|----------------|-------------|--------------------|
| Model    | 1   | 591.8152       | 591.815     | 438.9909           |
| Error    | 445 | 599.9163       | 1.348       | <b>Prob &gt; F</b> |
| C. Total | 446 | 1191.7315      |             | <.0001*            |

**Table S6 Parameter Estimates**

| Term      | Estimate  | Std Error | t Ratio | Prob> t |
|-----------|-----------|-----------|---------|---------|
| Intercept | 2.111378  | 0.187722  | 11.25   | <.0001* |
| LAI       | 1.2489657 | 0.059611  | 20.95   | <.0001* |

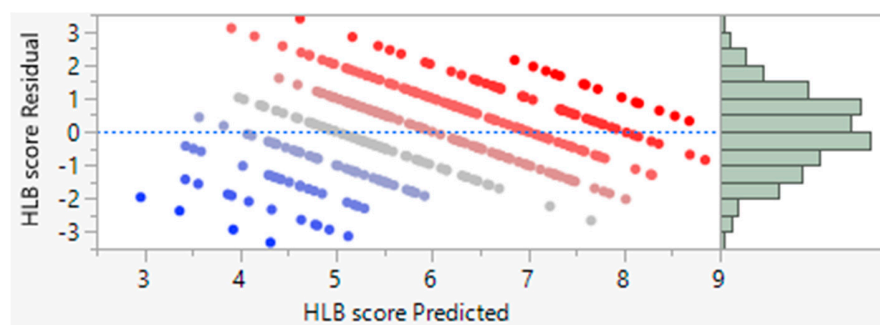**Figure S1.** Regression analysis of HLB visual score of mandarin hybrids with distribution of HLB visual score residuals.

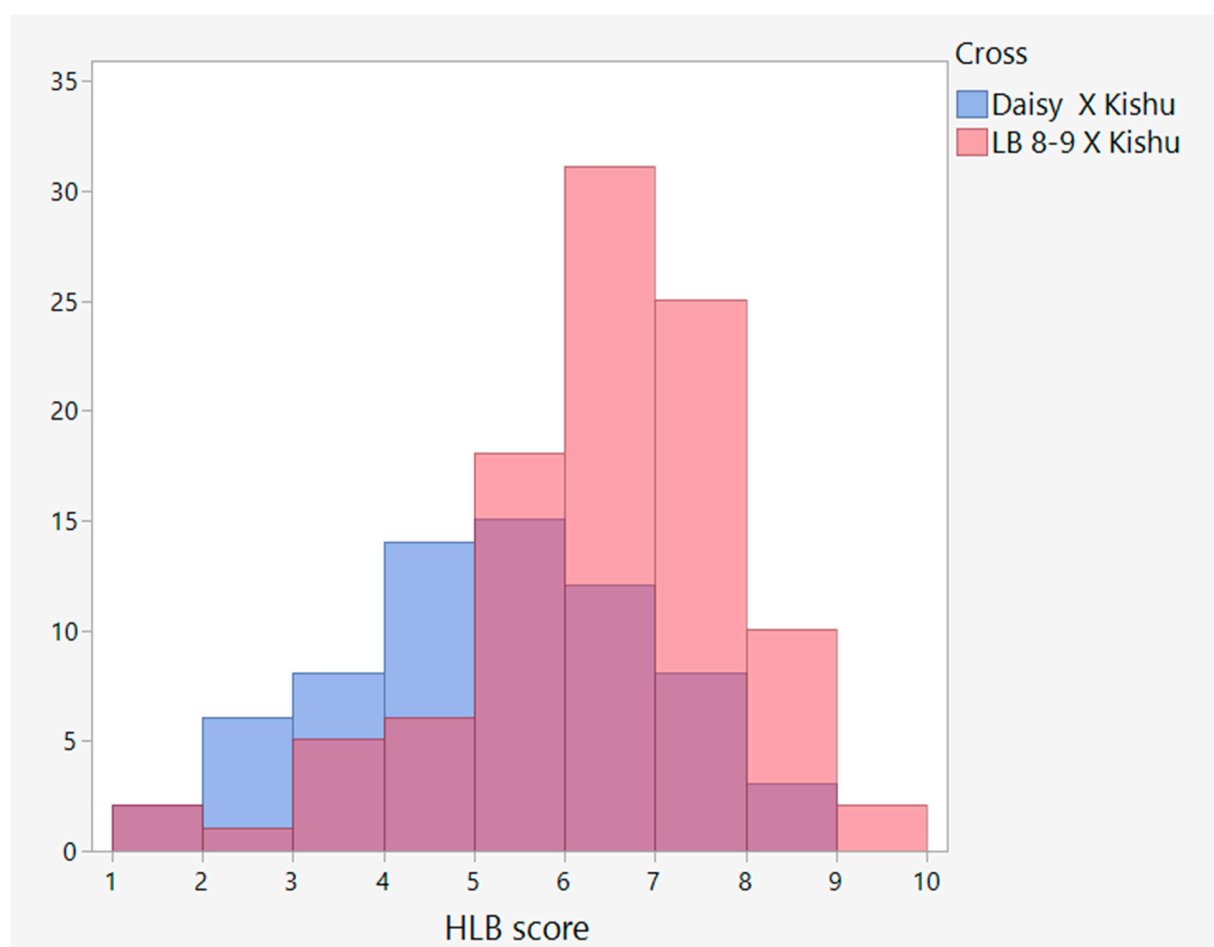

**Figure S2.** Distribution of HLB visual score in progenies of Daisy x Kishu and LB 8-9 x Kishu.
